1 **HAND1 knockdown disrupts trophoblast global gene expression**

2

3 Robert FRESCH, D.O.<sup>1</sup>, Jennifer COURTNEY Ph.D.<sup>2</sup>, Heather BROCKWAY Ph.D.<sup>3,4</sup>, Rebecca  
4 L. WILSON Ph.D.<sup>3,4</sup>, Helen JONES Ph.D.<sup>3, 4\*</sup>

5

6 <sup>1</sup>Division of Maternal-Fetal Medicine, Department of Obstetrics and Gynecology, University of  
7 Cincinnati College of Medicine, Cincinnati, Ohio USA 45229

8 <sup>2</sup>Center for Fetal and Placental Research, Cincinnati Children's Hospital Medical Center,  
9 Cincinnati, Ohio USA 45229

10 <sup>3</sup>Department of Physiology and Functional Genomics, University of Florida College of Medicine,  
11 Gainesville, Florida USA 32610

12 <sup>4</sup>Center for Research in Perinatal Outcomes, University of Florida College of Medicine,  
13 Gainesville, Florida USA 32610

14

15 \*Corresponding Author:

16 Helen Jones Ph.D.

17 Center for Research in Perinatal Outcomes

18 University of Florida College of Medicine

19 Gainesville, Florida 32610

20 Email: [jonesh@ufl.edu](mailto:jonesh@ufl.edu)

21

22 **Running Title:** *HAND1* knockdown disrupts trophoblast gene expression in vitro

23

24 **Disclosure Statement:** The authors report no conflict of interest.

25 **Funding:** This study was funded by Eunice Kennedy Shriver National Institute of Child Health  
26 and Human Development award R01HD091527 (HNJ).

27 **Data Availability:** RNA sequencing data have been made publicly available in NCBI GEO,  
28 accession number: GSE209620. All other data can be provided upon request.

29

30 **Abstract:**

31 Congenital heart disease (CHD) affects nearly 1% of births annually, and CHD pregnancies carry  
32 increased risk of developing pathologies of abnormal placentation. We previously reported  
33 significant developmental impacts of disrupting *Hand1*, a gene associated with CHD, expression  
34 in placenta trophoblast and endothelial cells in multiple mouse models. In this study, we aimed to  
35 build upon this knowledge and characterize the mechanistic impacts of disrupting *HAND1* on  
36 human placenta trophoblast and vascular endothelial cell gene expression. *HAND1* gene  
37 expression was silenced in BeWo cells, a choriocarcinoma model of human cytotrophoblasts,  
38 (n=3-9 passages) and isolated human placental microvascular endothelial cells (HPMVEC; n=3  
39 passages), with *HAND1* siRNA for 96 h. Cells were harvested, mRNA isolated and RNA  
40 sequencing performed using the Illumina NextSeq 550 platform. Normalization and differential  
41 gene expression analyses were conducted using general linear modeling in edgeR packages.  
42 Statistical significance was determined using a log<sub>2</sub> fold change of >1.0 or <-1.0 and unadjusted  
43 p-value ≤0.05. Panther DB was used for overrepresentation analysis, and String DB for protein  
44 association network analysis. There was downregulation of 664 genes, and upregulation of 59  
45 genes in BeWo cells with direct *HAND1* knockdown. Overrepresentation analysis identified  
46 disruption to pathways including cell differentiation, localization, and cell projection organization.  
47 In contrast, only 7 genes were changed with direct *HAND1* knockdown in HPMVECs. Disruption  
48 to *HAND1* expression significantly alters gene expression profile in trophoblast but not endothelial  
49 cells. This data provides further evidence that future studies on genetic perturbations in CHDs  
50 should consider the extra-embryonic tissue in addition to the fetal heart.

51

52 **Keywords:** Congenital Heart Defects, Hand1, Placenta, Transcriptome

53

54 **Introduction**

55 Congenital heart disease (CHD) affects nearly 1% of births annually, and often requires surgical  
56 intervention for repair and correction [1]. Despite advances in care, CHD is still a leading cause of  
57 infant mortality from pregnancies complicated by birth defects accounting for approximately 4.2%  
58 of all neonatal deaths, and is associated with healthcare costs of approximately \$6.1 billion dollars  
59 annually [2]. About 25% of babies with a CHD will have a severe CHD [3], and the prevalence of  
60 CHD, particularly mild disease, is increasing. CHD pregnancies also carry increased risk of

61 developing pathologies of abnormal placentation including fetal growth restriction (FGR),  
62 preeclampsia, preterm birth, and stillbirth [4]. These adverse pregnancy outcomes greatly impact  
63 cardiac care, specifically with regards to surgical morbidity and mortality, as well as impacting  
64 childhood development and survival [5].

65  
66 Currently, we lack comprehensive understanding of the embryonic and fetal relationship between  
67 development of the placenta and the heart. Using a systematic computational approach, we have  
68 shown numerous commonly expressed genes between first trimester human heart and placenta  
69 cells, which if disrupted may concurrently contribute to the developmental perturbations resulting  
70 in CHD (Wilson 2022). Our lab has previously reported disrupted vascular development, and  
71 morphologic abnormalities and placental insufficiency in placentas from human pregnancies with  
72 CHD [5,6]. The placenta is essential to fetal growth and development and placental dysfunction  
73 impacts perinatal outcomes [7]. This is because the placenta plays an essential role in regulating  
74 the transport of nutrients and oxygen from the mother to the fetus, and mediates maternal-fetal  
75 communication. In utero, initial heart and placenta development occurs in parallel during the first  
76 three weeks of gestation. We and others have shown common molecular pathways in placental and  
77 heart development [8,9]. However, in-depth knowledge of the regulation of these common  
78 molecular pathways, particularly in relation to vasculogenesis and angiogenesis, is lacking.  
79 Additionally, studies using mice models to better understand heart development have also been  
80 shown to exhibit abnormal placental development, although the latter is very rarely investigated  
81 [10].

82  
83 *HAND1* is a transcription factor related to the basic helix-loop-helix (bHLH) with essential roles  
84 in embryonic placenta and heart development [11], and is expressed in first trimester human  
85 placental trophoblast [12,13] and first trimester cardiac cells [14]. *Hand1*-null mice are embryonic  
86 lethal by E8.5 due to defects in the extraembryonic tissues [11,15-17]. The *Nkx2.5<sup>Cre</sup>/Hand1<sup>A126fs/+</sup>*  
87 mouse model is characterized by embryonic lethality at gestational day 15.5, as well as outflow  
88 tract abnormalities, thin myocardium and ventricular septal defects in the fetal heart [11]. More  
89 recently, we have shown that placentas of the *Nkx2.5<sup>Cre</sup>/Hand1<sup>A126fs/+</sup>* mouse, in which *Hand1* is  
90 mutated in trophoblast progenitor cells, fail to develop the appropriate cell layers in the labyrinth  
91 (nutrient exchange area), resulting in fetal demise [8]. However, using the *Cdh5<sup>cre</sup>/Hand1<sup>A126fs/+</sup>*

92 mouse model, which specifically mutates *Hand1* in endothelial cells of the placenta and heart, the  
93 placentas are only affected in later-gestation with reduced placental vascular branching, but little  
94 effect on fetal heart development [8]. Signaling between trophoblast cells and villous endothelium  
95 is necessary for placental development and function, however there is a paucity of data looking at  
96 how signaling occurs at a molecular level during development. In this study, we aimed to build  
97 upon our discoveries in the mouse models and characterize the impact of disrupting *HAND1*  
98 expression on molecular signaling in human placenta trophoblast and placental villous endothelial  
99 cells.

100

## 101 **Materials and Methods**

### 102 **BeWo Cell Culture**

103 BeWo choriocarcinoma cells, which have physiological characteristics of the villous trophoblast  
104 [18,19], were maintained at 37°C, 5% CO<sub>2</sub> in Ham's F-12 medium (Sigma, St. Louis, MO) with  
105 1% penicillin-streptomycin (Gibco, Waltham, MA), and 10% fetal bovine serum. Cells were sub-  
106 cultured every 3-4 days based on confluence estimates of 70-90%. Experiments were conducted  
107 on cells at passages 4-10.

108

### 109 **Human Placental Microvascular Endothelial Cell Culture**

110 Human Placenta Microvascular Endothelial Cells (HPMVECs) were cultured in T75 flasks pre-  
111 treated with attachment factor (Cell Applications Inc.) at 37°C, 5% CO<sub>2</sub> in EGM-2 media (Lonza,  
112 Allendale, NJ). Cells were sub-cultured every 3-4 days based on confluence estimates of 70-90%  
113 with media exchanges occurring every 2 days. Experiments were conducted on cells between  
114 passages 4-10.

115

### 116 **Direct *HAND1* knockdown in BeWo and HPMVECs**

117 BeWo cells or HPMVECs were plated ( $2.5 \times 10^5$  cells/well) onto Millicell hanging cell culture  
118 inserts (Millipore, Bedford, MA) in 12 chamber culture trays with respective culture media in both  
119 the well insert chamber. For HPMVECs, the inserts were pre-coated with attachment factor. After  
120 24 h, the well culture media was removed, cells washed with PBS, and replaced with treatment  
121 media: minimum essential media (MEM; Sigma, St. Louis, MO) containing 1% L-glutamine  
122 (Gibco, Waltham, MA) and 1% penicillin-streptomycin. To knockdown *HAND1* cells (n = 9

123 passages for BeWo cells and n = 3 passages for HPMVECs) were treated with 3  $\mu$ L Lipofectamine  
124 + 4  $\mu$ L 10  $\mu$ M *HAND1* siRNA for 96 h as laboratory standard [20]. Treatment of cells with 3  $\mu$ L  
125 Lipofectamine + 3  $\mu$ L 10  $\mu$ M Allstars negative siRNA was used as a negative control. After 6  
126 hours, 10% FBS was added to ensure cell survival without starvation effects of MEM. At 96 h,  
127 cells were harvested for RNA isolation following treatment.

128

### 129 **Isolation of RNA and confirmation of *HAND1* knockdown via QPCR**

130 Cells were lysed using RLT Buffer from Qiagen (Valencia, CA) following manufacturer's  
131 instructions. Total RNA was isolated using the RNeasy Mini Kit, QIAshredder, and on-column  
132 DNA digest (Qiagen) following the protocol provided by the manufacturer. For QPCR analysis,  
133 total RNA was quantified using a Nanodrop Spectrophotometer. 1  $\mu$ g of RNA was then converted  
134 to cDNA utilizing the Applied Biosystems High Capacity cDNA kit following manufacturer's  
135 protocol. QPCR was performed in duplicate reactions containing PowerUp SYBR Green (Applied  
136 Biosystems) as per manufacturer's instructions and with primers (Supplemental Table 1) on the  
137 StepOne-Plus Real-Time PCR System (Applied Biosystems). Relative mRNA expression was  
138 calculated using the comparative CT method [21] with the StepOne Software v2.3 (Applied  
139 Biosystems) normalizing genes to *ACTB*

140

### 141 **Transcriptome generation and differential gene expression bioinformatic analyses**

142 Total RNA was isolated from cells using same protocol as for QPCR. 50-100  $\mu$ g of RNA from the  
143 various treated BeWo cells, and HPMVECs (n=3 passages submitted to the University of  
144 Cincinnati Genomics, Epigenomics and Sequencing Core for RNA quality assessment and  
145 sequencing. RNA quality control (QC) was conducted on an Agilent 2100 Bioanalyzer and all  
146 samples passed control checks with acceptable RNA integrity numbers (RIN). For each  
147 experimental data set, poly-A RNA libraries were generated using (NEBNext Ultra Directional  
148 RNA Library Prep kit, New England Biolabs, Ipswich, MA and the TruSeq SR Cluster kit v3  
149 Illumina). Transcriptomes were generated on the Illumina NextSeq 550 platform with ~25 million  
150 reads per sample with a single end read length between 85-101bp. Initial quality control for post-  
151 sequencing reads, read alignment, and read count generation were all performed in the public  
152 Galaxy Bioinformatic server [22] utilizing the following tools: FASTQC [23], trimmomatic [24],  
153 Bowtie2 [25], and featurecounts [26]. All samples were then aligned utilizing the hg38 genome

154 build via Bowtie2, which allowed for more precise alignments of the numerous homologous genes  
155 expressed in these specific cell lines. For each different experiment, gene count matrices were  
156 generated using featurecounts and utilized for differential gene expression analyses. Differential  
157 gene expression analyses were conducted using the Empirical analysis of digital gene expression  
158 in R (EdgeR) package [27]. General linear modeling using the following pairwise comparisons  
159 were performed between, untreated controls, Allstars negative control treated, direct *HAND1*  
160 knockdown treated BeWo and HPMVEC cells that were treated directly. Multiple corrections  
161 testing yielded no statistical differences in the pairwise comparisons. Therefore, we used the raw  
162 p-values to determine genes to be used in overrepresentation analysis to identify pathways and  
163 processes rather than individual genes. RNA sequencing data have been deposited to NCBI GEO  
164 under the accession GSE209620.

165

## 166 **Overrepresentation analysis**

### 167 ***Panther DB Evaluation***

168 Lists of significantly differentially expressed genes identified between Allstar negative control and  
169 *HAND1* siRNA treated BeWos and HPMVECs were analyzed by PantherDB (Panther15.0) to  
170 determine over-representation and identify pathways and processes involved in trophoblast-  
171 endothelial cell signaling. Gene names were submitted with statistical testing conducted using  
172 Fisher's Exact test with multiple corrections testing via Bonferroni correction. We conducted  
173 analyses using Panther pathways, Reactome pathways, and GO Biological Processes against the  
174 entire genome for Homo sapiens.

175

### 176 ***In silico* StringDB assessment of interaction networks**

177 StringDB (version 11.0) was utilized to assess potential protein interactions affected by  
178 knockdown of *HAND1* in BeWo cells. Seven significantly differentially expressed genes with  
179 large fold-changes were individually entered into StringDB and then functional interactions  
180 classified into biological pathways. Parameters were set at Homo Sapiens, Experimental and  
181 Database sources, Full Network Search.

182

## 183 **Statistical Analysis**

184 qPCR data were analyzed in Prism v8 (GraphPad) using either Kruskal-Wallis test with Dunn's  
185 multiple comparison test or Mann-Whitney test. Data for qPCR is presented as the median  $\pm$   
186 interquartile range.

187

## 188 **Results:**

189 ***HAND1* siRNA treatment knocked-down *HAND1* expression in BeWo cells and HPMVECs**

190 Compared to Allstar negative control treated cells, treatment with *HAND1* siRNA for 96 h reduced

191 *HAND1* expression 61% in BeWo and 69% HPMVECs (Figure 1A & 1B, respectively).

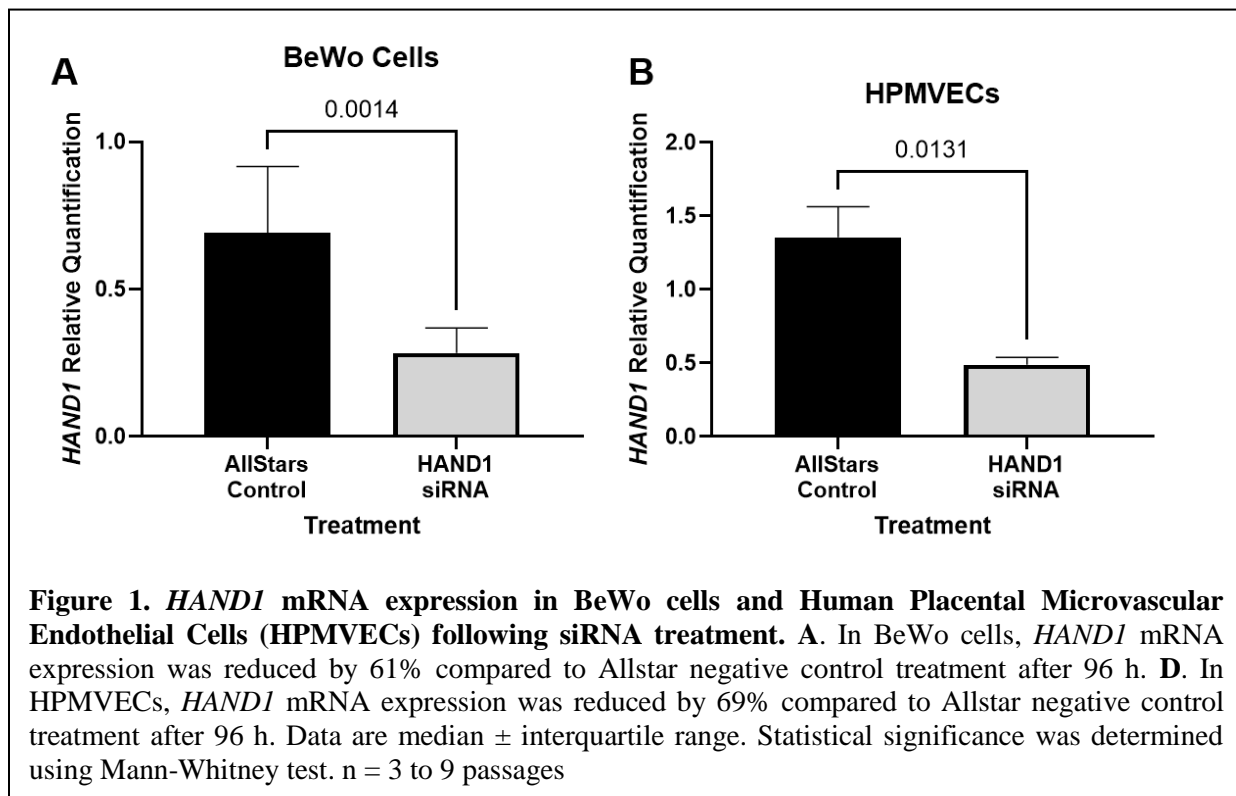

195 Compared to Allstar negative control, *HAND1* knockdown in BeWo cells resulted in

196 downregulation of 664 genes, and upregulation of 59 genes (Supplemental Material). PantherDB

197 was utilized to perform overrepresentation analysis against Panther pathways, Reactome

198 pathways, and Gene Ontology (GO) Biological processes on the differentially expressed genes.  
199 No overrepresentation was seen compared to Panther and Reactome pathways, however many  
200 results were returned for GO Biological processes (Supplemental Table 2). Groups of genes

201 identified as significantly over-represented in GO Biological processes were then re-entered into  
 202 PantherDB and indicated potential disruption to pathways including cell development, cellular  
 203 projection, regulation and establishment of localization, and regulation of multicellular function  
 204 (Table 1). There were several biological pathways over-represented, including GnRH releasing  
 205 hormone pathways, cardiac conduction and signaling, TGF-beta signaling, and signaling of RHO  
 206 GTPases. In addition, there was significant enrichment in MET activating PTK2 signaling, and  
 207 pathways related to signal transduction.

208

209 **Table 1:** Biological processes impacted by direct knockdown of the *HAND1* gene in BeWo cells

|                                                                                           | Fold Enrichment | Adjusted P value <sup>a</sup><br>Bonferroni |
|-------------------------------------------------------------------------------------------|-----------------|---------------------------------------------|
| <b>GO Biological Process: Developmental Processes (GO:0032502)</b>                        |                 |                                             |
| <b>Reactome pathways</b>                                                                  |                 |                                             |
| MET activates PTK2 signaling (R-HSA-8874081)                                              | 17.2            | 4.11E-02                                    |
| Organelle biogenesis and maintenance (R-HSA-1852241)                                      | 4.6             | 1.74E-02                                    |
| Signal Transduction (R-HSA-162582)                                                        | 1.89            | 1.73E-02                                    |
| <b>GO Biological Process: Cell Projection and Organization (GO:0030030)</b>               |                 |                                             |
| <b>Panther Pathways</b>                                                                   |                 |                                             |
| Organelle biogenesis and maintenance (R-HSA-1852241)                                      | 10.2            | 1.47E-06                                    |
| Signaling by Rho GTPases (R-HSA-194315)                                                   | 6.04            | 5.16E-03                                    |
| <b>GO Biological Process: Regulation of Localization (GO:0032879)</b>                     |                 |                                             |
| <b>Panther Pathways</b>                                                                   |                 |                                             |
| Integrin signaling pathway (P00034)                                                       | 5.29            | 2.79E-02                                    |
| <b>Reactome Pathways</b>                                                                  |                 |                                             |
| MET activates PTK2 signaling (R-HSA-8874081)                                              | 21.06           | 1.56E-02                                    |
| Cardiac conduction (R-HSA-5576891)                                                        | 9.09            | 5.99E-04                                    |
| Muscle contraction (R-HSA-397014)                                                         | 6.08            | 1.87E-02                                    |
| <b>GO Biological Process: Establishment of Localization (GO:0051234)</b>                  |                 |                                             |
| <b>Reactome pathways</b>                                                                  |                 |                                             |
| ABC-family proteins mediated transport (R-HSA-382556)                                     | 7.16            | 1.81E-02                                    |
| Membrane Trafficking (R-HSA-199991)                                                       | 3.63            | 1.75E-05                                    |
| <b>GO Biological Process: Regulation of Multicellular Organismal Process (GO:0051239)</b> |                 |                                             |
| <b>Panther Pathways</b>                                                                   |                 |                                             |
| TGF-beta signaling pathway (P00052)                                                       | 7.98            | 2.24E-02                                    |
| Gonadotropin-releasing hormone receptor pathway (P06664)                                  | 7.86            | 9.78E-07                                    |
| EGF receptor signaling pathway (P00018)                                                   | 6.71            | 1.76E-02                                    |
| <b>Reactome pathways</b>                                                                  |                 |                                             |



|                                                    |      |          |
|----------------------------------------------------|------|----------|
| Toll-like Receptor Cascades (R-HSA-168898)         | 8.57 | 9.80E-04 |
| Cardiac conduction (R-HSA-5576891)                 | 8.44 | 4.22E-03 |
| Toll Like Receptor 4 (TLR4) Cascade (R-HSA-166016) | 8.27 | 1.82E-02 |

<sup>a</sup> Statistical significance of over-representation was determined using Fisher's Exact Test with Bonferroni corrections for multiple corrections.

210

211 StringDB network analysis of seven genes with large fold change differences in expression  
 212 following *HAND1* knockdown in BeWo cells were found to be involved in biological pathways  
 213 with known importance in growth and development (Table 2). Upregulated genes were *CALML5*,  
 214 *NUBP1*, *TFAP2E*, and *WNT8A*. Downregulated genes; *FAM49B*, *CTTNBP2*, and *NFS1*. Reactome  
 215 pathways examined identified common relationships between the genes including Beta-catenin  
 216 phosphorylation, TGF-beta signaling, and PI3K-Akt signaling. Other notable biological pathways  
 217 included cardiac conduction and calcium channel signaling, GnRH and Estrogen dependent gene  
 218 expression, eNOS activation and regulation, and iron-sulfur and sulfur metabolism pathways and  
 219 RHO GTPases (Figure 2).

220

221 **Table 2:** Differentially expressed genes with large fold-change differences in BeWo cells in  
 222 which *HAND1* was knocked down

|                      | Gene (Ensembl gene ID)           | Log2 FC | Raw P-value <sup>a</sup> |
|----------------------|----------------------------------|---------|--------------------------|
| <b>Upregulated</b>   |                                  |         |                          |
|                      | <i>CALML5</i> (ENSG00000178372)  | 4.6384  | 0.0012                   |
|                      | <i>NUBP1</i> (ENSG00000103274)   | 4.2640  | 0.0124                   |
|                      | <i>TFAP2E</i> (ENSG00000116819)  | 3.5473  | 0.0041                   |
|                      | <i>WNT8A</i> (ENSG00000061492)   | 2.9174  | 0.0065                   |
| <b>Downregulated</b> |                                  |         |                          |
|                      | <i>FAM49B</i> (ENSG00000153310)  | -5.8251 | 0.0001                   |
|                      | <i>CTTNBP2</i> (ENSG00000077063) | -5.6647 | 0.0007                   |
|                      | <i>NFS1</i> (ENSG00000244005)    | -5.4039 | 0.0001                   |

<sup>a</sup> Statistical testing applied within edgeR general linear models. FC = fold-change

223

224

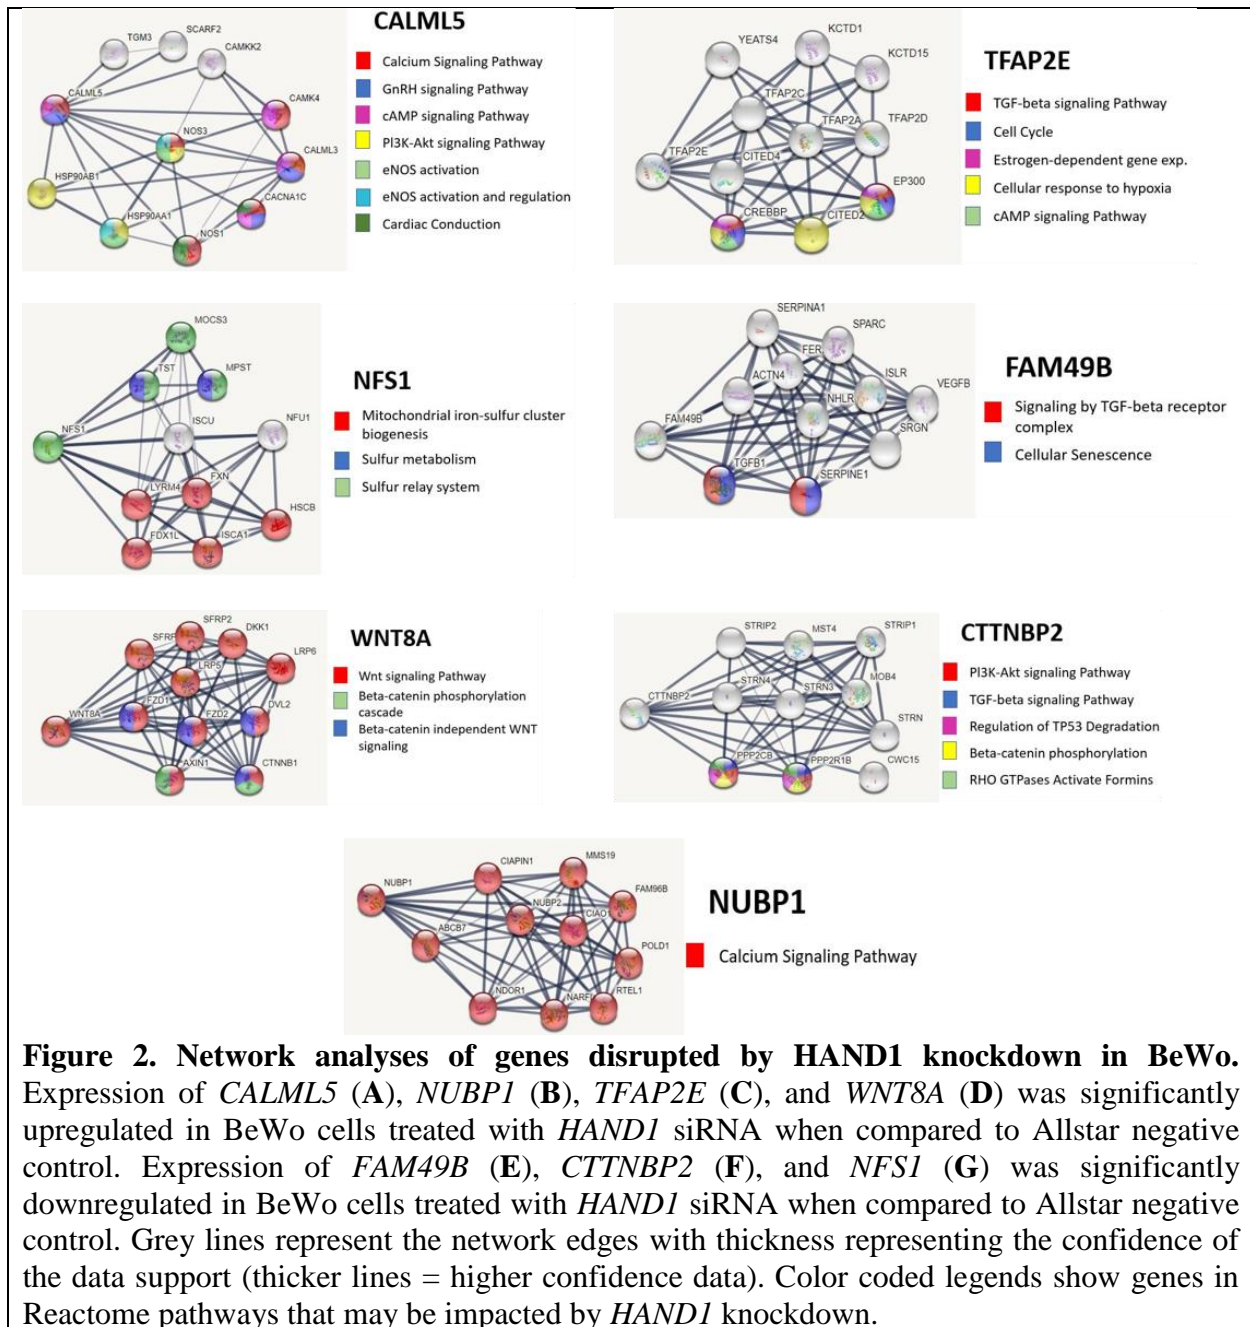

**Figure 2. Network analyses of genes disrupted by HAND1 knockdown in BeWo.** Expression of *CALML5* (A), *NUBP1* (B), *TFAP2E* (C), and *WNT8A* (D) was significantly upregulated in BeWo cells treated with *HAND1* siRNA when compared to Allstar negative control. Expression of *FAM49B* (E), *CTTNBP2* (F), and *NFS1* (G) was significantly downregulated in BeWo cells treated with *HAND1* siRNA when compared to Allstar negative control. Grey lines represent the network edges with thickness representing the confidence of the data support (thicker lines = higher confidence data). Color coded legends show genes in Reactome pathways that may be impacted by *HAND1* knockdown.

225

226 **Direct treatment of HPMVECs with *HAND1* siRNA minimally disrupted global gene**  
 227 **expression**

228 Direct *HAND1* knockdown in HPMVECs resulted in minimal disruption to global gene expression  
 229 with differential expression in just seven genes (Table 3). QPCR validation confirmed two genes

230 of interest, *GADD45g* and *NPPB* as reduced and increased, respectively in *HAND1* siRNA treated  
 231 HPMVECs when compared to Allstar negative control (Figure 3).

232

233 **Table 3.** Significantly differentially expressed genes in Human Placenta Microvascular  
 234 Endothelial cells in which *HAND1* was knocked down

|                      | Gene (Ensembl gene ID)           | Log2 FC | Raw P-value <sup>a</sup> |
|----------------------|----------------------------------|---------|--------------------------|
| <b>Upregulated</b>   |                                  |         |                          |
|                      | <i>NPPB</i> (ENSG00000120937)    | 1.5991  | 0.0001                   |
|                      | <i>DMKN</i> (ENSG00000161249)    | 1.5035  | 0.0019                   |
|                      | <i>CHRD2</i> (ENSG00000054938)   | 1.4178  | 0.0044                   |
| <b>Downregulated</b> |                                  |         |                          |
|                      | <i>ARC</i> (ENSG00000198576)     | -1.8451 | 0.0000                   |
|                      | <i>ELAVL3</i> (ENSG00000196361)  | -1.8349 | 0.0009                   |
|                      | <i>HKDC1</i> (ENSG00000156510)   | -1.6111 | 0.0049                   |
|                      | <i>GADD45G</i> (ENSG00000130222) | -1.4619 | 0.0071                   |

<sup>a</sup> Statistical testing applied within edgeR general linear models. FC = fold-change

235

236

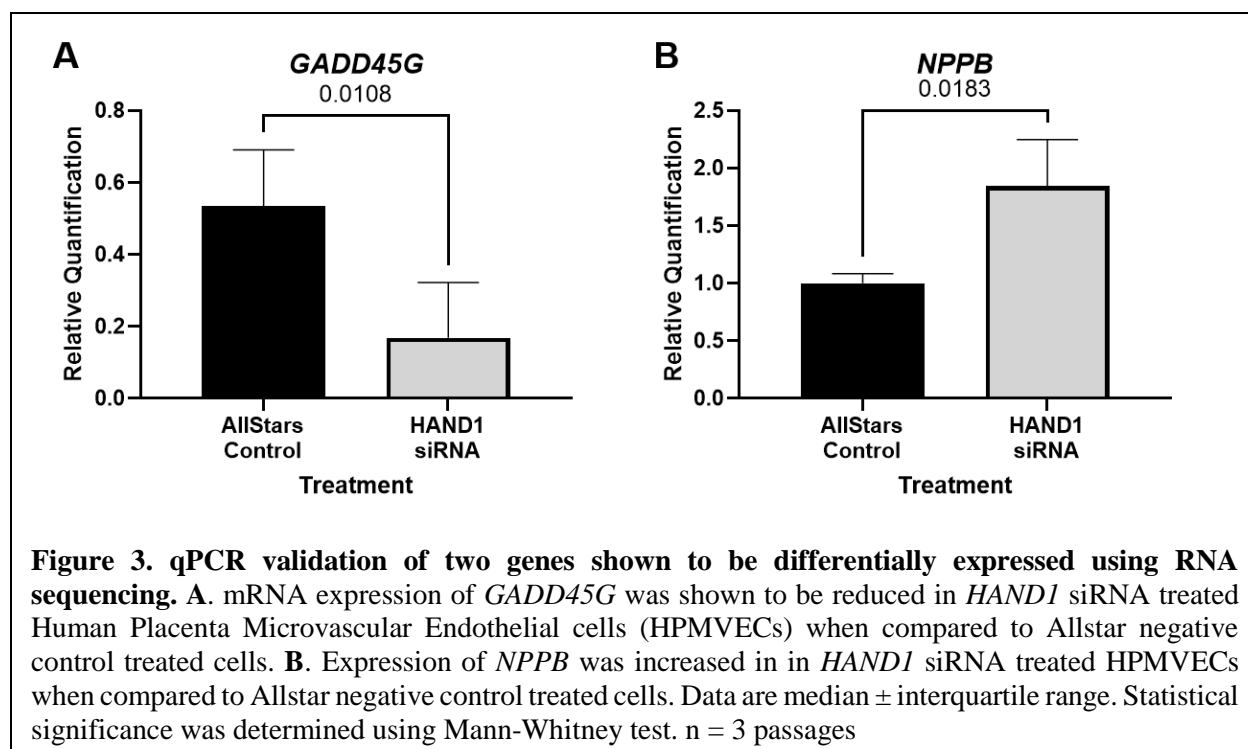

237

238

239

240 **Discussion:**

241 CHDs are often associated with pregnancy complications such as fetal growth restriction and  
242 preeclampsia, these conditions negatively impact clinical outcomes, increase the risk of neonatal  
243 morbidity and mortality, and are likely a consequence of abnormal placental development and  
244 function [28-32]. We have previously shown in mice, that targeted loss of *Hand1* in chorionic and  
245 labyrinthine progenitor trophoblasts led to abnormal formation of the placental labyrinth, and  
246 ultimately embryonic lethality [8]. Histological analysis of the placenta indicated that loss of  
247 *Hand1* in labyrinthine progenitor trophoblasts early in pregnancy significantly impacted the ability  
248 for the placenta to form syncytial layers, and impacted development of the labyrinthine  
249 vasculature. In this study we aimed to gain further mechanistic, translational understanding of the  
250 effects of *HAND1* knockdown in models of human placenta trophoblast and villous endothelial  
251 cells. We demonstrated significant alterations to placental trophoblast gene expression following  
252 *HAND1* knockdown, and identified potential pathways which may be significantly impacted by  
253 loss of *HAND1* regulation. This study is the first to identify possible molecular signaling pathways  
254 that are impacted by disruption to *HAND1* in the human placenta.

255 Overall, there were 664 genes differentially expressed in BeWo cells due to *HAND1*  
256 knockdown. Overrepresentation analyses reveals several key GO Biological Processes including:  
257 cell development, establishment of localization, and regulation of multicellular function, as well  
258 as biological pathways including PI3K-Akt signaling, signaling Rho GTPases, and TLR cascades.  
259 Trophoblast differentiation during the first trimester of pregnancy involves trophoblast  
260 proliferation, invasion and extracellular matrix (ECM) remodeling. PI3K/Akt signaling reduction  
261 or inhibition plays an important role in trophoblast proliferation, migration, and survival.  
262 Disruption to PI3K/Akt signaling in early embryonic development is associated with growth  
263 restriction, preterm birth, and embryonic lethality [33], highlighting the importance of this  
264 signaling pathway to placental development and function. Additionally, inhibition of PI3K  
265 increases soluble fms-like tyrosine kinase 1 (sFlt1), a common biomarker of pre-eclampsia [34].  
266 PI3K/Akt signaling has been closely linked to signaling Rho-GTPases which are known to play a  
267 role in trophoblast migration [35,36].

268 TLR cascades form the major family of pattern recognition receptors that are involved in  
269 innate immunity. The maternal-fetal interface immunologically is unique in that it must promote  
270 tolerance of the fetus while maintaining protection to the mother. Trophoblasts play an important

271 role in modulating the maternal immune response throughout pregnancy, including through TLR  
272 signaling [37]. Additionally, TLR signaling has been shown to potentially modulate angiogenesis  
273 as culture of trophoblasts with TLR2 ligand HKML have been shown to promote the expression  
274 of pro-angiogenic Placenta Growth Factor [38]. Overall, poor migration of trophoblasts, and  
275 communication with resident immune cells, can impact invasion and establishment of a fully  
276 functional maternal-fetal interface.

277 Expression of *CALML5* and *NUBP1* was upregulated in BeWo cells following *HAND1*  
278 knockdown. Both genes are involved with Calcium channel signaling, GnRH signaling, cAMP  
279 signaling, eNOS activation and PI3K-Akt signaling pathways. These are important biological  
280 pathways that impact trophoblast invasion, differentiation, development, resource control and  
281 growth of the placenta and fetus [39,40], and increased gene expression of *CALML5* and *NUBP1*  
282 may be a compensatory response to disruption of other signaling pathways. On the other hand,  
283 expression of *CTTNBP2* and *NSF1* was downregulated in BeWo cells in which *HAND1* was  
284 knocked down. *CTTNBP2* has been shown to have a direct relationship with the WNT signaling  
285 pathway [41], and downregulation in WNT signaling in the placenta has been associated with  
286 pathological pregnancies [42]. Similarly, *NSF1* is a gene that has an essential role in iron-sulfur  
287 cluster processing making it important for electron transport, enzyme catalysis, and regulation of  
288 gene expression as well as iron homeostasis [43]. Fetal growth is very dependent on energy  
289 metabolism in the placenta as it drives exchange of nutrients and plays a crucial role in DNA  
290 synthesis. Overall, our data indicates potential disruption to these pathways with *HAND1*  
291 knockdown and provides further understanding of how a genetic perturbation in this gene may  
292 lead to growth issues, developmental defects, and lethality/miscarriage in the context of human  
293 pregnancies with CHDs.

294 We sought to analyze the effect of *HAND1* knockdown in cells within the villous  
295 environment. Interestingly, direct *HAND1* knockdown in villous endothelial cells resulted in  
296 minimal impact to gene expression. This result however is in agreement with our mouse model  
297 studies suggest that disrupting *Hand1* expression directly in labyrinthine endothelial cells impacted  
298 vascular remodeling only in late pregnancy and non-branching angiogenesis mechanisms[8] not  
299 as individual endothelial cells or vasculogenesis. HPMVECs are cultured as a single monolayer.  
300 Therefore, it would be interesting for future studies, beyond the scope of the current study, to  
301 assess angiogenesis and remodeling mechanisms in a 3D vascularized model when *HAND1/2* is

302 knocked down or cultured in ‘conditioned’ media from BeWo cells treated with *HAND1/2* siRNA.  
303 Cell-cell communication/signaling within the placenta villi in the human is believed to be  
304 important in establishment of the villous structure and exchange region but given our current data,  
305 the involvement of other cell types such as stromal fibroblasts in the communication process  
306 requires future investigation.

307 We and others have consistently shown that *HAND1* is important to both fetal heart and  
308 placenta development [8,9], with the present study providing further mechanistic understanding of  
309 how *HAND1* may influence the development of the placenta in the human. Given our data shows  
310 greater disruption to global gene expression in placenta trophoblasts than endothelial cells with  
311 *HAND1* knockdown, this further highlights the importance of future research to consider analyzing  
312 the extra-embryonic tissue, as well as the heart, in the context of CHD.

313

#### 314 **References**

- 315 1. van der Linde, D.; Konings, E.E.; Slager, M.A.; Witsenburg, M.; Helbing, W.A.;  
316 Takkenberg, J.J.; Roos-Hesselink, J.W. Birth prevalence of congenital heart disease  
317 worldwide: a systematic review and meta-analysis. *J Am Coll Cardiol* **2011**, *58*, 2241-  
318 2247, doi:10.1016/j.jacc.2011.08.025.
- 319 2. Arth, A.C.; Tinker, S.C.; Simeone, R.M.; Ailes, E.C.; Cragan, J.D.; Grosse, S.D. Inpatient  
320 Hospitalization Costs Associated with Birth Defects Among Persons of All Ages - United  
321 States, 2013. *MMWR Morb Mortal Wkly Rep* **2017**, *66*, 41-46,  
322 doi:10.15585/mmwr.mm6602a1.
- 323 3. Oster, M.E.; Lee, K.A.; Honein, M.A.; Riehle-Colarusso, T.; Shin, M.; Correa, A.  
324 Temporal trends in survival among infants with critical congenital heart defects. *Pediatrics*  
325 **2013**, *131*, e1502-1508, doi:10.1542/peds.2012-3435.
- 326 4. Courtney, J.A.; Cnota, J.F.; Jones, H.N. The Role of Abnormal Placentation in Congenital  
327 Heart Disease; Cause, Correlate, or Consequence? *Front Physiol* **2018**, *9*, 1045,  
328 doi:10.3389/fphys.2018.01045.
- 329 5. Courtney, J.; Troja, W.; Owens, K.J.; Brockway, H.M.; Hinton, A.C.; Hinton, R.B.; Cnota,  
330 J.F.; Jones, H.N. Abnormalities of placental development and function are associated with  
331 the different fetal growth patterns of hypoplastic left heart syndrome and transposition of  
332 the great arteries. *Placenta* **2020**, *101*, 57-65, doi:10.1016/j.placenta.2020.09.007.
- 333 6. Jones, H.N.; Olbrych, S.K.; Smith, K.L.; Cnota, J.F.; Habli, M.; Ramos-Gonzales, O.;  
334 Owens, K.J.; Hinton, A.C.; Polzin, W.J.; Muglia, L.J.; et al. Hypoplastic left heart  
335 syndrome is associated with structural and vascular placental abnormalities and leptin  
336 dysregulation. *Placenta* **2015**, *36*, 1078-1086, doi:10.1016/j.placenta.2015.08.003.
- 337 7. Burton, G.J.; Fowden, A.L. The placenta: a multifaceted, transient organ. *Philos Trans R*  
338 *Soc Lond B Biol Sci* **2015**, *370*, 20140066, doi:10.1098/rstb.2014.0066.

- 339 8. Courtney, J.A.; Wilson, R.L.; Cnota, J.; Jones, H.N. Conditional Mutation of Hand1 in the  
340 Mouse Placenta Disrupts Placental Vascular Development Resulting in Fetal Loss in Both  
341 Early and Late Pregnancy. *Int J Mol Sci* **2021**, *22*, doi:10.3390/ijms22179532.
- 342 9. Firulli, B.A.; McConville, D.P.; Byers, J.S., 3rd; Vincentz, J.W.; Barnes, R.M.; Firulli,  
343 A.B. Analysis of a Hand1 hypomorphic allele reveals a critical threshold for embryonic  
344 viability. *Dev Dyn* **2010**, *239*, 2748-2760, doi:10.1002/dvdy.22402.
- 345 10. Perez-Garcia, V.; Fineberg, E.; Wilson, R.; Murray, A.; Mazzeo, C.I.; Tudor, C.; Sienerth,  
346 A.; White, J.K.; Tuck, E.; Ryder, E.J.; et al. Placentation defects are highly prevalent in  
347 embryonic lethal mouse mutants. *Nature* **2018**, *555*, 463-468, doi:10.1038/nature26002.
- 348 11. Firulli, A.B.; McFadden, D.G.; Lin, Q.; Srivastava, D.; Olson, E.N. Heart and extra-  
349 embryonic mesodermal defects in mouse embryos lacking the bHLH transcription factor  
350 Hand1. *Nat Genet* **1998**, *18*, 266-270, doi:10.1038/ng0398-266.
- 351 12. Telugu, B.P.; Adachi, K.; Schlitt, J.M.; Ezashi, T.; Schust, D.J.; Roberts, R.M.; Schulz,  
352 L.C. Comparison of extravillous trophoblast cells derived from human embryonic stem  
353 cells and from first trimester human placentas. *Placenta* **2013**, *34*, 536-543,  
354 doi:10.1016/j.placenta.2013.03.016.
- 355 13. James, J.L.; Hurley, D.G.; Gamage, T.K.; Zhang, T.; Vather, R.; Pantham, P.; Murthi, P.;  
356 Chamley, L.W. Isolation and characterisation of a novel trophoblast side-population from  
357 first trimester placentae. *Reproduction* **2015**, *150*, 449-462, doi:10.1530/REP-14-0646.
- 358 14. Cui, Y.; Zheng, Y.; Liu, X.; Yan, L.; Fan, X.; Yong, J.; Hu, Y.; Dong, J.; Li, Q.; Wu, X.;  
359 et al. Single-Cell Transcriptome Analysis Maps the Developmental Track of the Human  
360 Heart. *Cell Rep* **2019**, *26*, 1934-1950 e1935, doi:10.1016/j.celrep.2019.01.079.
- 361 15. Cserjesi, P.; Brown, D.; Lyons, G.E.; Olson, E.N. Expression of the novel basic helix-loop-  
362 helix gene eHAND in neural crest derivatives and extraembryonic membranes during  
363 mouse development. *Dev Biol* **1995**, *170*, 664-678, doi:10.1006/dbio.1995.1245.
- 364 16. Riley, P.; Anson-Cartwright, L.; Cross, J.C. The Hand1 bHLH transcription factor is  
365 essential for placentation and cardiac morphogenesis. *Nat Genet* **1998**, *18*, 271-275,  
366 doi:10.1038/ng0398-271.
- 367 17. Morikawa, Y.; Cserjesi, P. Extra-embryonic vasculature development is regulated by the  
368 transcription factor HAND1. *Development* **2004**, *131*, 2195-2204, doi:10.1242/dev.01091.
- 369 18. Kudo, Y.; Boyd, C.A.; Kimura, H.; Cook, P.R.; Redman, C.W.; Sargent, I.L. Quantifying  
370 the syncytialisation of human placental trophoblast BeWo cells grown in vitro. *Biochim*  
371 *Biophys Acta* **2003**, *1640*, 25-31, doi:10.1016/s0167-4889(03)00004-1.
- 372 19. Gauster, M.; Huppertz, B. The paradox of caspase 8 in human villous trophoblast fusion.  
373 *Placenta* **2010**, *31*, 82-88, doi:10.1016/j.placenta.2009.12.007.
- 374 20. Jones, H.N.; Jansson, T.; Powell, T. IL-6 stimulates system A amino acid transporter  
375 activity in trophoblast cells through STAT3 and increased expression of SNAT2. *American*  
376 *Journal of Physiology-Cell Physiology* **2009**, *297*, C1228-C1235.
- 377 21. Pfaffl, M.W. A new mathematical model for relative quantification in real-time RT-PCR.  
378 *Nucleic Acids Res* **2001**, *29*, e45.
- 379 22. Boekel, J.; Chilton, J.M.; Cooke, I.R.; Horvatovich, P.L.; Jagtap, P.D.; Kall, L.; Lehtio, J.;  
380 Lukasse, P.; Moerland, P.D.; Griffin, T.J. Multi-omic data analysis using Galaxy. *Nat*  
381 *Biotechnol* **2015**, *33*, 137-139, doi:10.1038/nbt.3134.
- 382 23. Andrews, S.; Krueger, F.; Segonds-Pichon, A.; Biggins, L.; Krueger, C.; Wingett, S.  
383 FastQC: a quality control tool for high throughput sequence data [Internet]. 2010.

- 384 24. Bolger, A.M.; Lohse, M.; Usadel, B. Trimmomatic: a flexible trimmer for Illumina  
385 sequence data. *Bioinformatics* **2014**, *30*, 2114-2120, doi:10.1093/bioinformatics/btu170.
- 386 25. Langmead, B.; Salzberg, S.L. Fast gapped-read alignment with Bowtie 2. *Nat Methods*  
387 **2012**, *9*, 357-359, doi:10.1038/nmeth.1923.
- 388 26. Liao, Y.; Smyth, G.K.; Shi, W. featureCounts: an efficient general purpose program for  
389 assigning sequence reads to genomic features. *Bioinformatics* **2014**, *30*, 923-930,  
390 doi:10.1093/bioinformatics/btt656.
- 391 27. Robinson, M.D.; McCarthy, D.J.; Smyth, G.K. edgeR: a Bioconductor package for  
392 differential expression analysis of digital gene expression data. *Bioinformatics* **2010**, *26*,  
393 139-140, doi:10.1093/bioinformatics/btp616.
- 394 28. Cnota, J.F.; Hangge, P.T.; Wang, Y.; Woo, J.G.; Hinton, A.C.; Divanovic, A.A.;  
395 Michelfelder, E.C.; Hinton, R.B. Somatic growth trajectory in the fetus with hypoplastic  
396 left heart syndrome. *Pediatr Res* **2013**, *74*, 284-289, doi:10.1038/pr.2013.100.
- 397 29. Puri, K.; Warshak, C.R.; Habli, M.A.; Yuan, A.; Sahay, R.D.; King, E.C.; Divanovic, A.;  
398 Cnota, J.F. Fetal somatic growth trajectory differs by type of congenital heart disease.  
399 *Pediatr Res* **2018**, *83*, 669-676, doi:10.1038/pr.2017.275.
- 400 30. Ruiz, A.; Ferrer, Q.; Sanchez, O.; Ribera, I.; Arevalo, S.; Alomar, O.; Mendoza, M.;  
401 Cabero, L.; Carreras, E.; Llurba, E. Placenta-related complications in women carrying a  
402 foetus with congenital heart disease. *J Matern Fetal Neonatal Med* **2016**, *29*, 3271-3275,  
403 doi:10.3109/14767058.2015.1121480.
- 404 31. Laas, E.; Lelong, N.; Thiulin, A.C.; Houyel, L.; Bonnet, D.; Ancel, P.Y.; Kayem, G.;  
405 Goffinet, F.; Khoshnood, B.; Group, E.S. Preterm birth and congenital heart defects: a  
406 population-based study. *Pediatrics* **2012**, *130*, e829-837, doi:10.1542/peds.2011-3279.
- 407 32. Tararbit, K.; Lelong, N.; Goffinet, F.; Khoshnood, B.; Group, E.S. Assessing the risk of  
408 preterm birth for newborns with congenital heart defects conceived following infertility  
409 treatments: a population-based study. *Open Heart* **2018**, *5*, e000836, doi:10.1136/openhrt-  
410 2018-000836.
- 411 33. Yu, J.S.; Cui, W. Proliferation, survival and metabolism: the role of PI3K/AKT/mTOR  
412 signalling in pluripotency and cell fate determination. *Development* **2016**, *143*, 3050-3060.
- 413 34. Park, J.K.; Jeong, J.W.; Kang, M.Y.; Baek, J.C.; Shin, J.K.; Lee, S.A.; Choi, W.S.; Lee,  
414 J.H.; Paik, W.Y. Inhibition of the PI3K-Akt pathway suppresses sFlt1 expression in human  
415 placental hypoxia models in vitro. *Placenta* **2010**, *31*, 621-629,  
416 doi:10.1016/j.placenta.2010.04.009.
- 417 35. Duquette, P.M.; Lamarche-Vane, N. Rho GTPases in embryonic development. *Small*  
418 *GTPases* **2014**, *5*, 8, doi:10.4161/sgtp.29716.
- 419 36. Gupta, S.K.; Malhotra, S.S.; Malik, A.; Verma, S.; Chaudhary, P. Cell Signaling Pathways  
420 Involved During Invasion and Syncytialization of Trophoblast Cells. *Am J Reprod*  
421 *Immunol* **2016**, *75*, 361-371, doi:10.1111/aji.12436.
- 422 37. Koga, K.; Mor, G. Toll-like receptors at the maternal-fetal interface in normal pregnancy  
423 and pregnancy disorders. *Am J Reprod Immunol* **2010**, *63*, 587-600, doi:10.1111/j.1600-  
424 0897.2010.00848.x.
- 425 38. Kato, E.; Yamamoto, T.; Chishima, F. Effects of cytokines and TLR ligands on the  
426 production of PlGF and sVEGFR1 in primary trophoblasts. *Gynecologic and Obstetric*  
427 *Investigation* **2017**, *82*, 39-46.



- 428 39. Liu, J.; Maccalman, C.D.; Wang, Y.L.; Leung, P.C. Promotion of human trophoblasts  
429 invasion by gonadotropin-releasing hormone (GnRH) I and GnRH II via distinct signaling  
430 pathways. *Mol Endocrinol* **2009**, *23*, 1014-1021, doi:10.1210/me.2008-0451.
- 431 40. Moreau, R.; Hamel, A.; Daoud, G.; Simoneau, L.; Lafond, J. Expression of calcium  
432 channels along the differentiation of cultured trophoblast cells from human term placenta.  
433 *Biol Reprod* **2002**, *67*, 1473-1479, doi:10.1095/biolreprod.102.005397.
- 434 41. Kelly, A.C.; Bidwell, C.A.; McCarthy, F.M.; Taska, D.J.; Anderson, M.J.; Camacho, L.E.;  
435 Limesand, S.W. RNA Sequencing Exposes Adaptive and Immune Responses to  
436 Intrauterine Growth Restriction in Fetal Sheep Islets. *Endocrinology* **2017**, *158*, 743-755,  
437 doi:10.1210/en.2016-1901.
- 438 42. Zmijanac Partl, J.; Karin, V.; Skrtic, A.; Nikuseva-Martic, T.; Serman, A.; Mlinarec, J.;  
439 Curkovic-Perica, M.; Vranic, S.; Serman, L. Negative regulators of Wnt signaling pathway  
440 SFRP1 and SFRP3 expression in preterm and term pathologic placentas. *The Journal of*  
441 *Maternal-Fetal & Neonatal Medicine* **2018**, *31*, 2971-2979.
- 442 43. Brzoska, K.; Meczynska, S.; Kruszewski, M. Iron-sulfur cluster proteins: electron transfer  
443 and beyond. *Acta Biochim Pol* **2006**, *53*, 685-691.
